# Supplementary material for: Rational control of a polyacetylene helix by a pendant rotaxane switch
Source: Royal Society of Chemistry journal article supplement (doi:10.1039/c1cc14404a), 2011-01-01
Supplement: c1cc14404a.pdf [file c1cc14404a.pdf]

Supporting Information for

# Reversible Control of Polyacetylene Helix by Pendant Rotaxane Switch

Fumitaka Ishiwari, Kazuko Nakazono, Yasuhito Koyama, and Toshikazu Takata\*

Department of Organic and Polymeric Materials

Tokyo Institute of Technology

2-12-1 (H-126), Ookayama, Meguro-ku, Tokyo 152-8552, Japan.

ttakata@polymer.titech.ac.jp

## Table of Contents

|                                                                                                      |     |
|------------------------------------------------------------------------------------------------------|-----|
| <b>1. Materials and methods</b>                                                                      | S3  |
| <b>2. Experiments</b>                                                                                | S4  |
| <b>3. Spectra</b>                                                                                    |     |
| <b>3-1. <math>^1\text{H}</math> and <math>^{13}\text{C}</math> NMR spectra, HH COSY correlations</b> | S6  |
| <b>3-2. High-resolution mass spectra</b>                                                             | S11 |
| <b>3-3. FT-IR spectra</b>                                                                            | S12 |
| <b>3-4. CD and UV-vis spectra</b>                                                                    | S13 |
| <b>3-5. UV and FP spectra</b>                                                                        | S21 |
| <b>4. References</b>                                                                                 | S22 |

## 1. Materials and Methods

Commercially available materials and solvents including NaBH(AcO)<sub>3</sub> (Aldrich), paraformaldehyde (Nakalai Tesque, Ltd.), [RhCl(nbd)]<sub>2</sub> (Wako Pure Chemical Industries, Ltd.), 1,8-diazabicyclo[5,4,0]undec-7-ene (Aldrich), *N*-methylpyrrolidone (NMP, Wako Pure Chemical Industries, Ltd.), and triethylamine (Wako Pure Chemical Industries, Ltd.) were used without further purification. SiO<sub>2</sub> column chromatography was performed using Wakogel C-400HG (Wako Pure Chemical Industries Ltd.). Al<sub>2</sub>O<sub>3</sub> column chromatography was performed using Merck Aluminum Oxide 90 standardized. Rotaxanes (**R**)-**2** and (**R**)-**2Ac** were prepared according to the literature.<sup>[1]</sup>

<sup>1</sup>H (400 MHz) and <sup>13</sup>C (100 MHz) NMR spectra were recorded on a JEOL AL-400 spectrometer using CDCl<sub>3</sub> as the solvent and tetramethylsilane as the internal standard. Samples were purified by repeated preparative gel permeation chromatography (GPC) on a JAI Co., Ltd. LC-9204 system (JAIGEL-1H-40) with CHCl<sub>3</sub> as the eluent. IR spectra were recorded on a JASCO FT/IR-230 spectrometer. Melting points were measured with a Stuart Scientific SMP3 (Bibby Scientific). UV-vis spectra were taken on a JASCO V-550 UV-vis spectrophotometer. CD spectra were taken on a JASCO J-820 spectropolarimeter. Specific optical rotations were measured on a JASCO DIP-1000 digital polarimeter in a 10 cm cuvette. High-resolution mass spectra (HR-MS) data were taken by the National University Corporation, Tokyo Institute of Technology, Center for Advanced Materials Analysis, on request.

## 2. Experiments

### Synthesis of rotaxane **(R)-1b**: *N*-Methylation<sup>[2]</sup> of **(R)-2**

A solution of rotaxane **(R)-1b** (600 mg, 0.423 mmol), paraformaldehyde (300 mg, 10.0 mmol), NaBH(AcO)<sub>3</sub> (600 mg, 2.83 mmol), and triethylamine (1 mL) in NMP (5 mL) was stirred for 8 h at 70 °C under an Ar atmosphere. The reaction mixture was poured into water (500 mL), and the precipitate was collected by filtration. The products were dissolved in EtOAc; washed with H<sub>2</sub>O, sat. NaHCO<sub>3</sub> (aq.), and brine; dried over MgSO<sub>4</sub>; and concentrated *in vacuo*. The residue was purified by Al<sub>2</sub>O<sub>3</sub> column chromatography (EtOAc) to give rotaxane **rac-7** (440 mg, 0.342 mmol, 81%) as a colorless foam.  $[\alpha]_D^{25}$ : +121.1° (*c* = 0.10, THF), mp 81.4–83.1 °C, <sup>1</sup>H NMR (400 MHz, CDCl<sub>3</sub>, 298 K): δ 8.09 (s, 1H), 8.04 (s, 1H), 7.90 (d, *J* = 9.1 Hz, 1H), 7.86 (d, *J* = 8.1 Hz, 1H), 7.74 (d, *J* = 9.1 Hz, 1H), 7.70 (d, *J* = 8.1 Hz, 1H), 7.52 (s, 1H), 7.36 (d, *J* = 8.1 Hz, 2H), 7.32–7.30 (m, 3H), 7.28–7.18 (m, 4H), 7.15–7.14 (m, 2H), 7.02 (t, *J* = 7.6 Hz, 2H), 6.93 (d, *J* = 8.1 Hz, 2H), 6.75–6.72 (m, 2H), 6.65–6.63 (m, 1H), 6.59–6.57 (m, 1H), 5.38 (s, 2H), 4.39–4.34 (m, 1H), 3.96–3.93 (m, 3H), 3.87–3.81 (m, 2H), 3.71–3.63 (m, 3H), 3.58–3.51 (m, 3H), 3.39–3.06 (m, 14H), 2.89–2.85 (m, 1H), 2.84 (s, 1H), 2.13 (s, 3H), 1.34 (s, 18H), 1.12–1.11 (m, 21H) ppm, <sup>13</sup>C NMR (100 MHz, CDCl<sub>3</sub>): δ 164.8, 154.4, 154.3, 151.6, 146.5, 146.4, 139.66, 136.9, 133.9, 133.6, 133.0, 132.6, 131.0, 130.6, 130.5, 130.2, 130.0, 129.8, 129.7, 128.2, 128.1, 127.9, 126.7, 125.4, 125.0, 124.7, 124.5, 124.3, 123.8, 123.6, 123.0, 122.3, 121.7, 120.7, 117.6, 116.7, 112.1, 112.0, 104.6, 93.4, 81.6, 79.2, 71.3, 71.2, 71.0, 70.9, 70.7, 70.5, 70.3, 69.4, 69.2, 68.1, 67.8, 66.3, 52.8, 52.1, 34.9, 31.3, 18.7, 11.2 ppm, IR (neat) ν 3278, 2949, 2866, 2155, 1731, 1592, 1505, 1457, 1362, 1309, 1221, 1129, 950, 844, 750, 670, 557 cm<sup>-1</sup>. FAB HR-MS Calc'd for C<sub>82</sub>H<sub>100</sub>NO<sub>10</sub>Si [M+H]<sup>+</sup>: *m/z* = 1286.7117. Found: *m/z* = 1286.7084.

### Synthesis of **(R)-1a**:

A solution of rotaxane **(R)-1b** (100 mg, 0.078 mmol) in CHCl<sub>3</sub> (50 mL) was washed with ca. 10% HPF<sub>6</sub> aq. (15 mL × 3) and brine, dried over MgSO<sub>4</sub>, and concentrated *in vacuo*. The residue was purified by recycle preparative GPC (CHCl<sub>3</sub>) to give rotaxane **(R)-1a** (111 mg, 0.078 mmol, 100%) as a colorless foam.  $[\alpha]_D^{25}$ : +119.6° (*c* = 0.15, THF), mp 113.1–115.2 °C, <sup>13</sup>C NMR (100 MHz, CDCl<sub>3</sub>, 298 K) δ 164.8, 153.8, 153.6, 151.8, 151.5, 147.7, 147.5, 147.4, 147.3, 139.7, 136.9, 136.5, 133.6, 133.5, 133.4, 132.95, 132.91, 132.6, 132.2, 132.1, 130.7, 130.6, 130.4, 130.3, 129.9, 129.8, 129.4, 129.1, 128.1, 128.0, 127.8, 127.5, 126.7, 126.5, 126.0, 125.2, 125.1, 125.0, 124.7, 124.6, 124.5, 124.4, 123.9, 123.7, 123.1, 123.0, 121.4, 121.3, 121.2, 121.1, 121.0, 120.5, 120.1, 119.0, 115.5, 115.2, 115.1, 114.4, 112.1, 112.0, 111.8, 111.6, 104.6, 93.5, 81.6, 79.3, 79.2, 71.4, 71.3, 71.2, 71.1, 71.0, 70.9, 70.7, 70.6, 70.5, 70.4, 70.2, 70.1, 69.5, 68.9, 68.0, 67.9, 67.8, 67.6, 66.5, 66.3, 61.1, 60.9, 60.7, 60.4, 53.5, 39.3, 39.2, 34.8, 34.7, 31.4, 31.3, 18.7, 11.2 ppm, IR (KBr) ν 3283, 3064, 2953, 2866, 2154, 1727, 1621, 1591, 1506, 1459, 1363, 1309, 1251, 1221, 1085, 1031, 951, 844, 748, 679, 637 cm<sup>-1</sup>. FAB HR-MS Calc'd for C<sub>82</sub>H<sub>100</sub>NO<sub>10</sub>Si [M-HPF<sub>6</sub>]<sup>+</sup>: *m/z* = 1286.7117. Found: *m/z* = 1286.7229.

### Synthesis of **poly-(R)-1a**: Polymerization of **(R)-1a**

To a solution of **(R)-1a** (200 mg, 0.141 mmol) in CHCl<sub>3</sub> (478 μL) was added a solution (82 μL) consisting of [RhCl(nbd)]<sub>2</sub> (4.0 mg, 8.7 μmol) and Et<sub>3</sub>N (10 μL) in CHCl<sub>3</sub> (990 μL). The mixture was stirred for 4 h at room temperature. The solution was poured into Et<sub>2</sub>O. The precipitate was collected by filtration to give polyacetylene **poly-(R)-1a** (190 mg, 0.134 mmol, 95%) as a red solid. IR (KBr) ν 3062, 2952, 2866, 2155, 1731, 1622, 1593, 1506, 1457, 1248, 1110, 949, 843, 750, 681, 558 cm<sup>-1</sup>.

### 3. Spectra

#### 3-1. $^1\text{H}$ and $^{13}\text{C}$ NMR spectra, HH COSY correlations

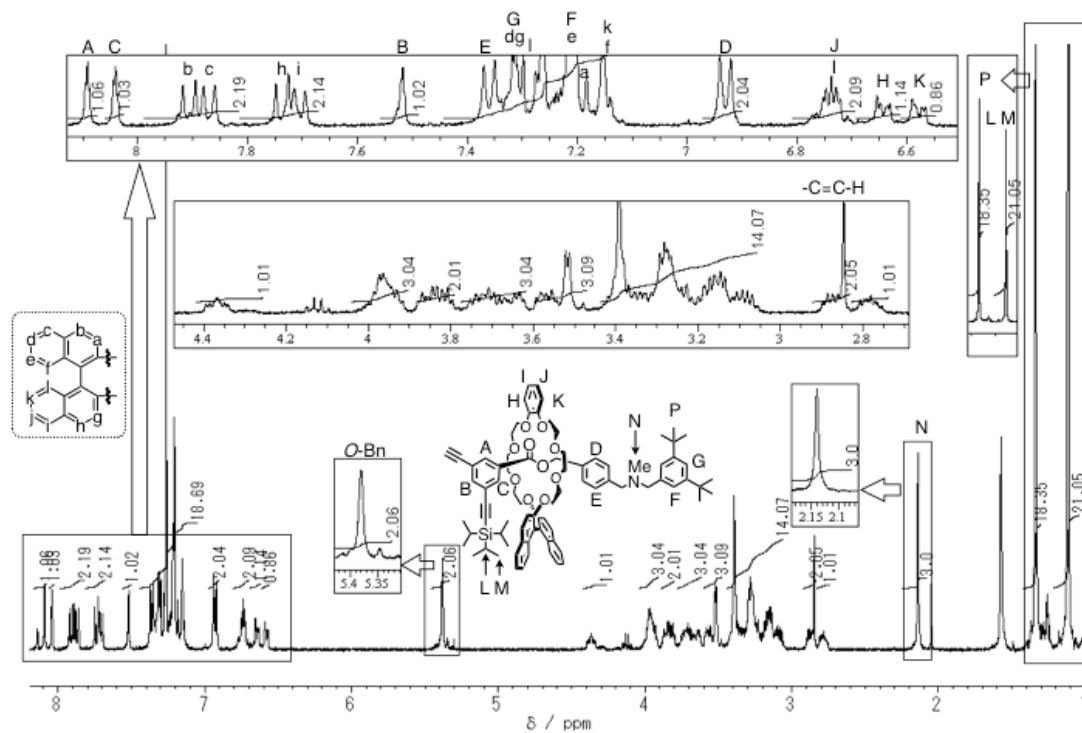

Figure S1.  $^1\text{H}$  NMR spectrum of  $(R)$ -1b (400 MHz,  $\text{CDCl}_3$ , 298 K)

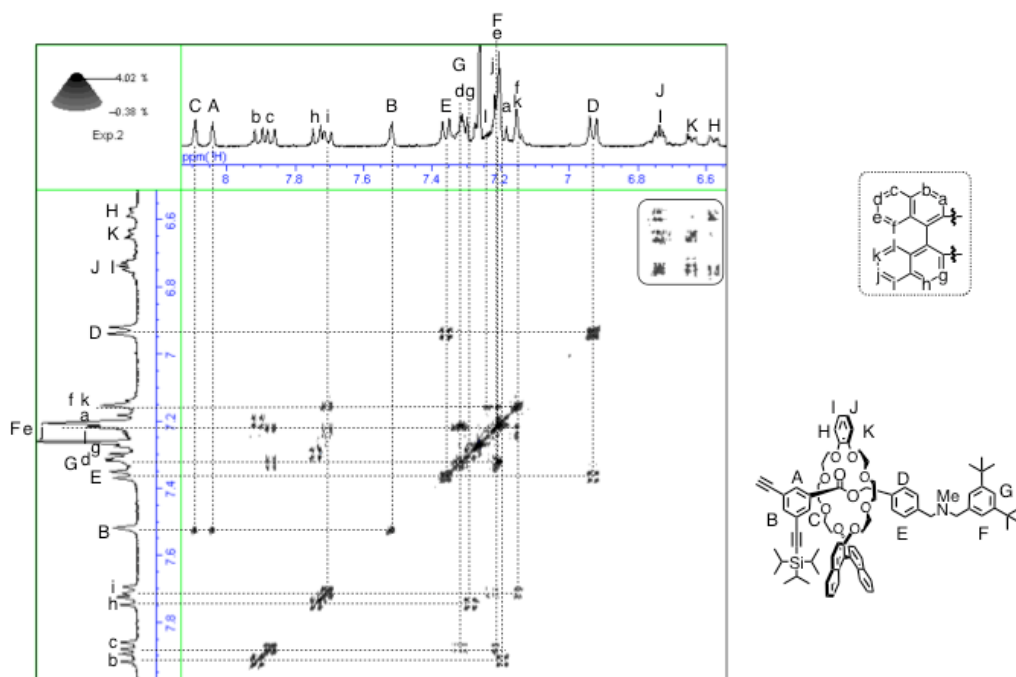

**Figure S2.** HH COSY correlations of (**R**)-**1b** (400 MHz, CDCl<sub>3</sub>, 298 K)

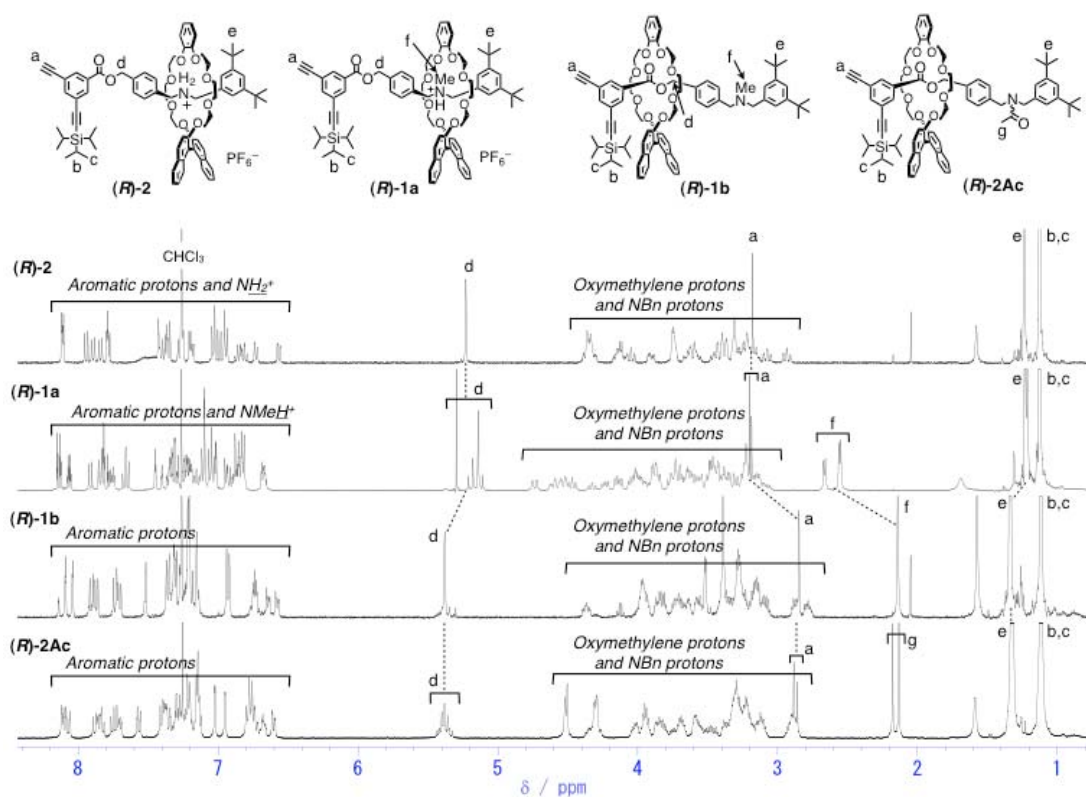

**Figure S3.** <sup>1</sup>H NMR spectra of (**R**)-**2**, (**R**)-**1a**, (**R**)-**1b**, and (**R**)-**2Ac** (400 MHz, CDCl<sub>3</sub>, 298 K)

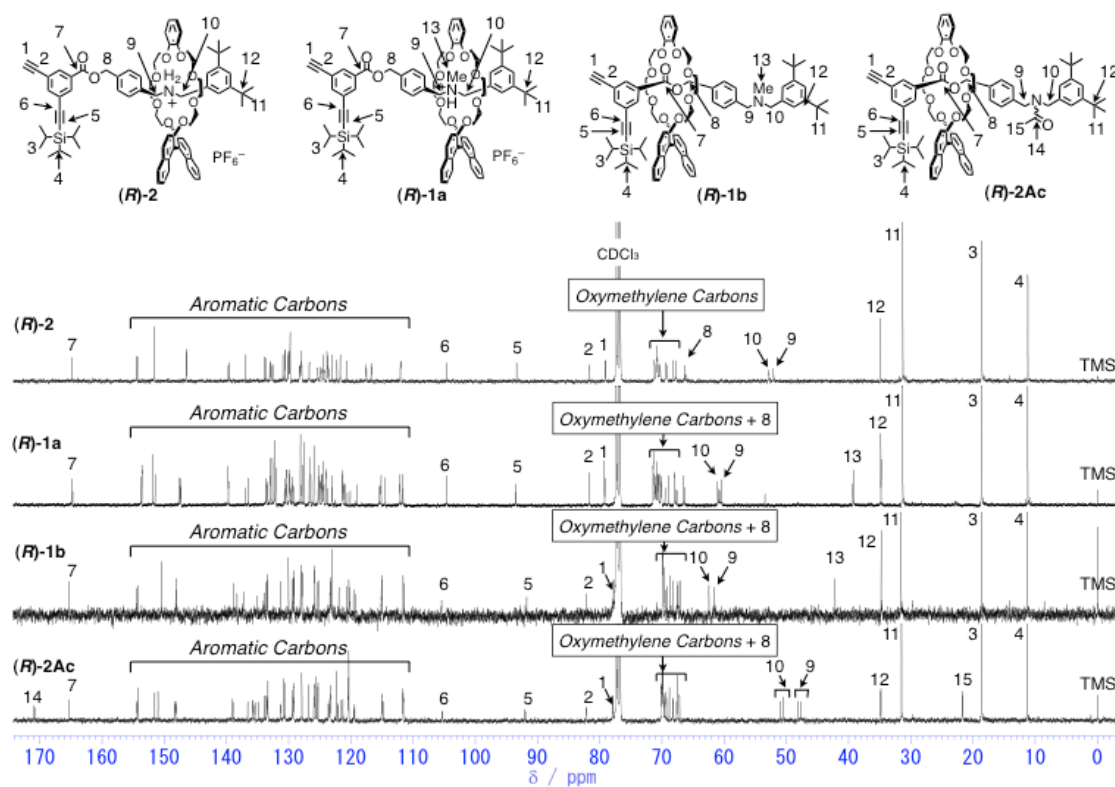

**Figure S4.**  $^{13}\text{C}$  NMR spectra of (*R*)-**2**, (*R*)-**1a**, (*R*)-**1b**, and (*R*)-**2Ac** (100 MHz,  $\text{CDCl}_3$ , 298 K)

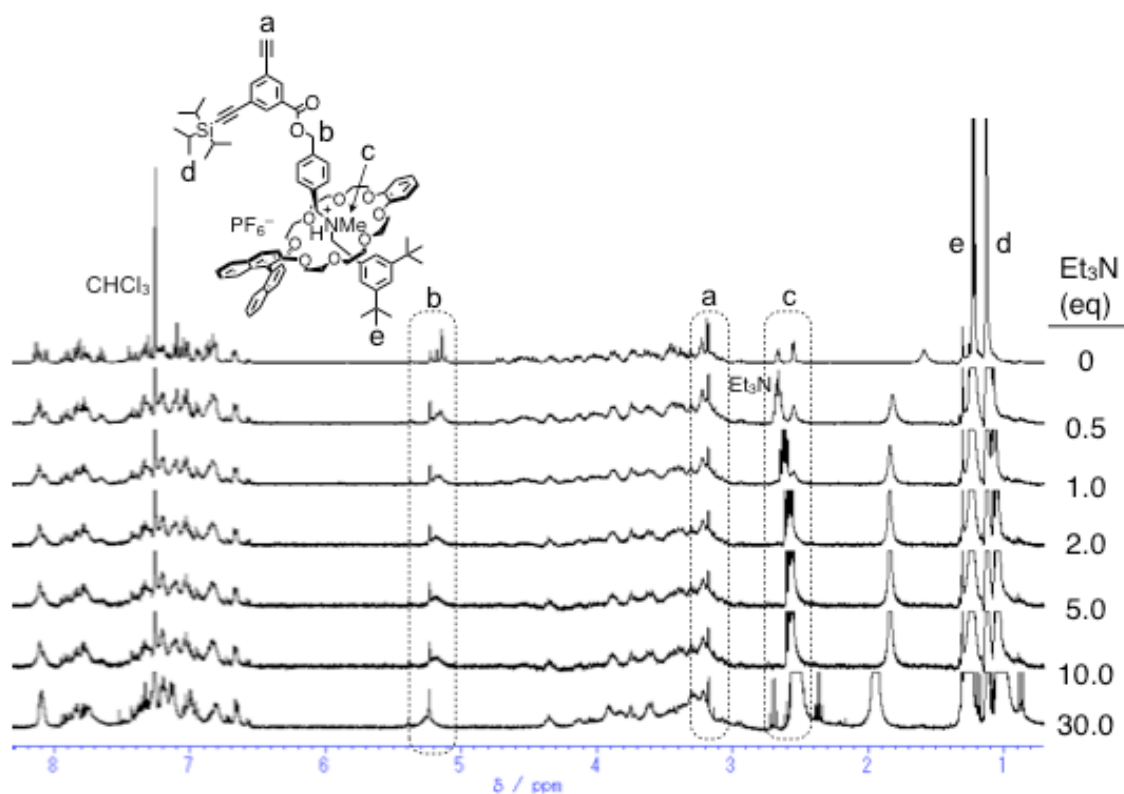

**Figure S5.** Titration of (*R*)-**1a** by  $\text{Et}_3\text{N}$  ( $^1\text{H}$  NMR, 400 MHz,  $\text{CDCl}_3$ , 298 K)



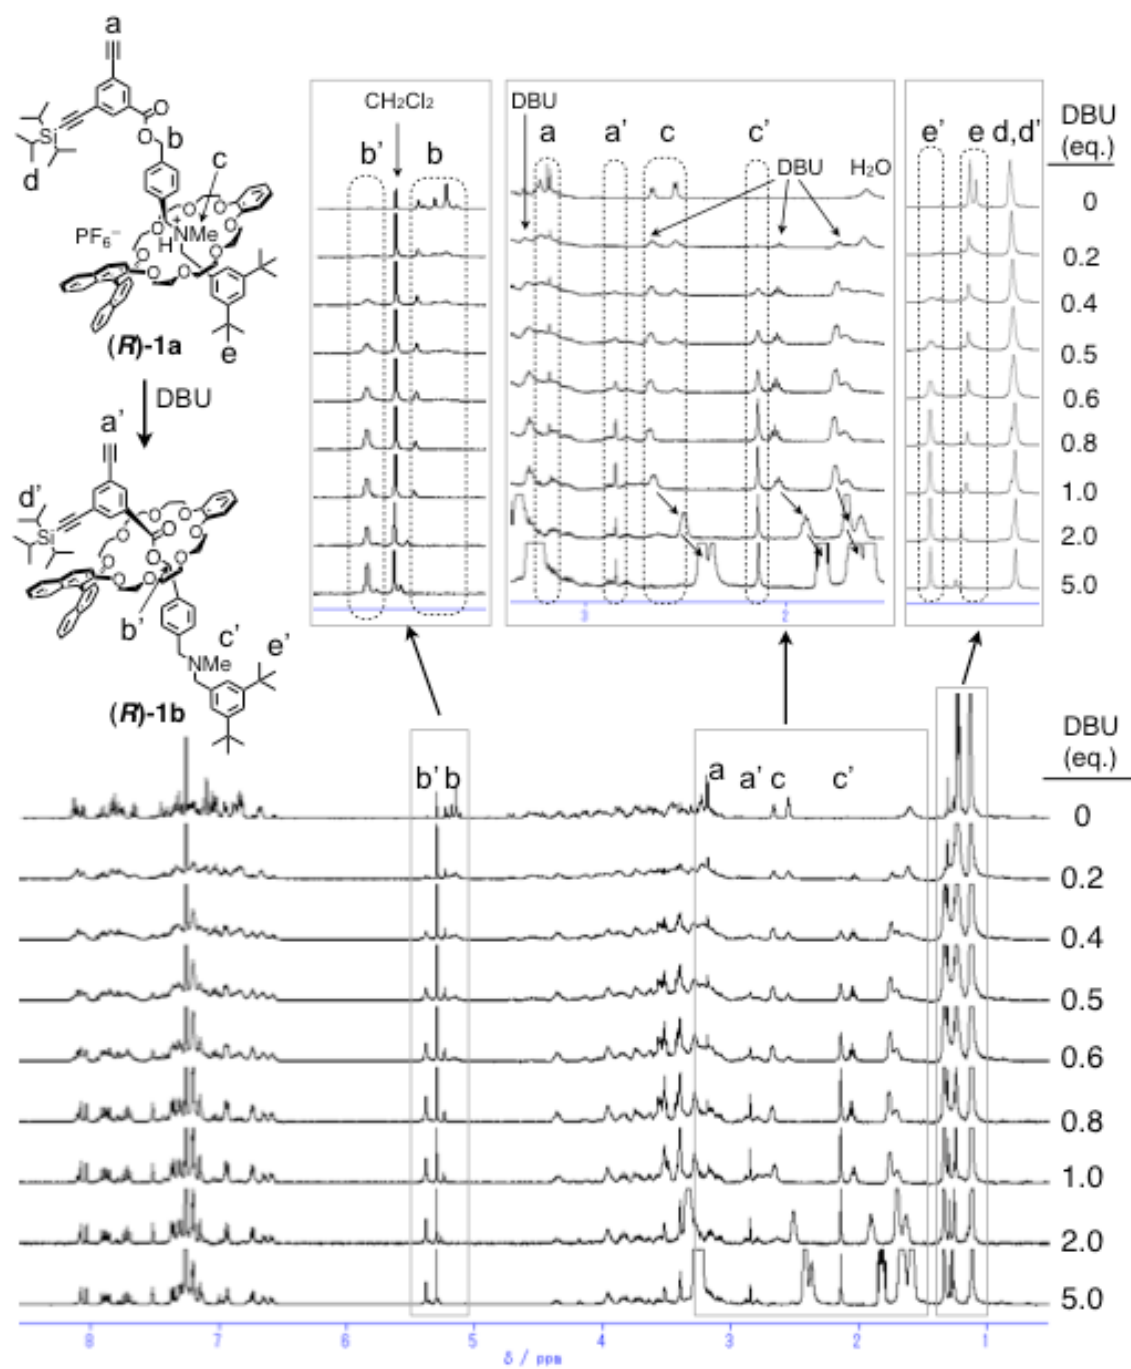

**Figure S6.** Titration of **(R)-1a** by DBU ( $^1\text{H}$  NMR, 400 MHz,  $\text{CDCl}_3$ , 298 K)

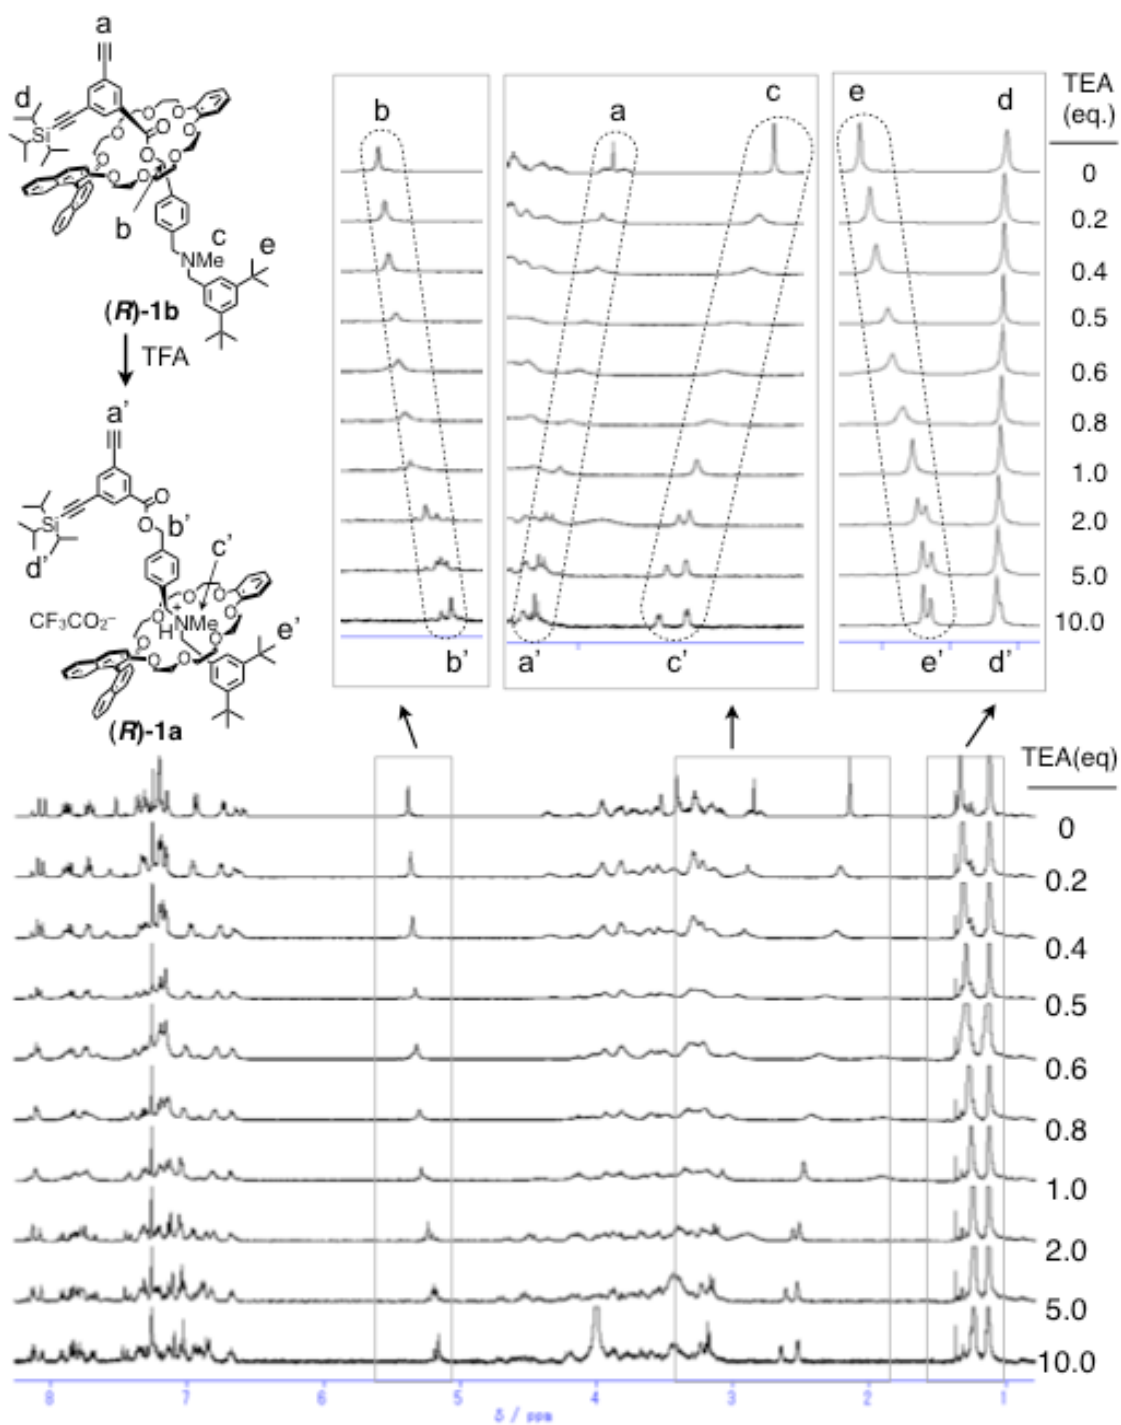

Figure S7. Titration of **(R)-1b** by CF<sub>3</sub>COOH (<sup>1</sup>H NMR, 400 MHz, CDCl<sub>3</sub>, 298 K)

### 3-2. High-resolution mass spectra

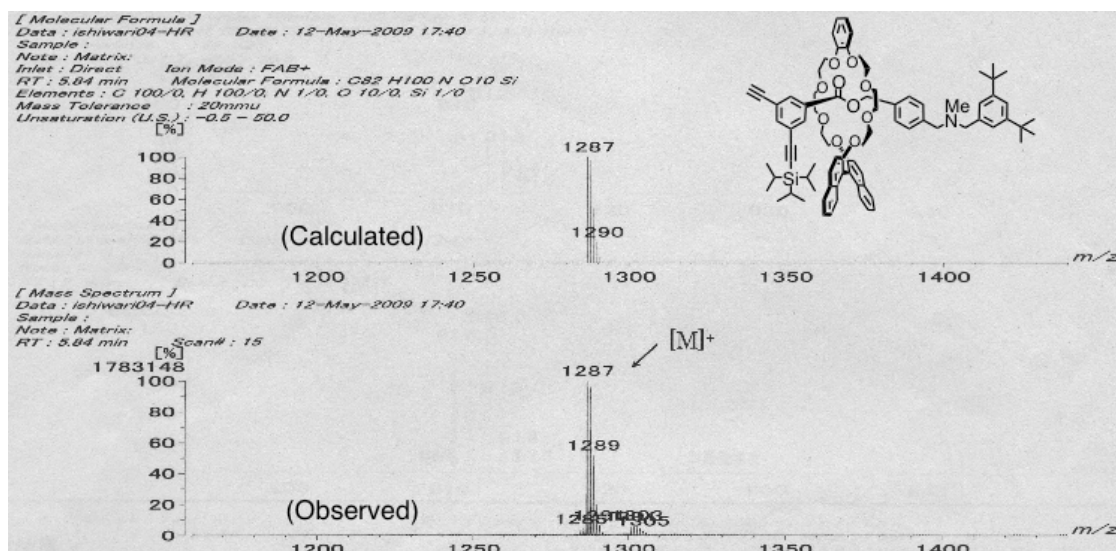

Figure S8. FAB-MS spectrum of (R)-1a (Ion mode: FAB<sup>+</sup>, matrix: NBA, solvent: CHCl<sub>3</sub>)

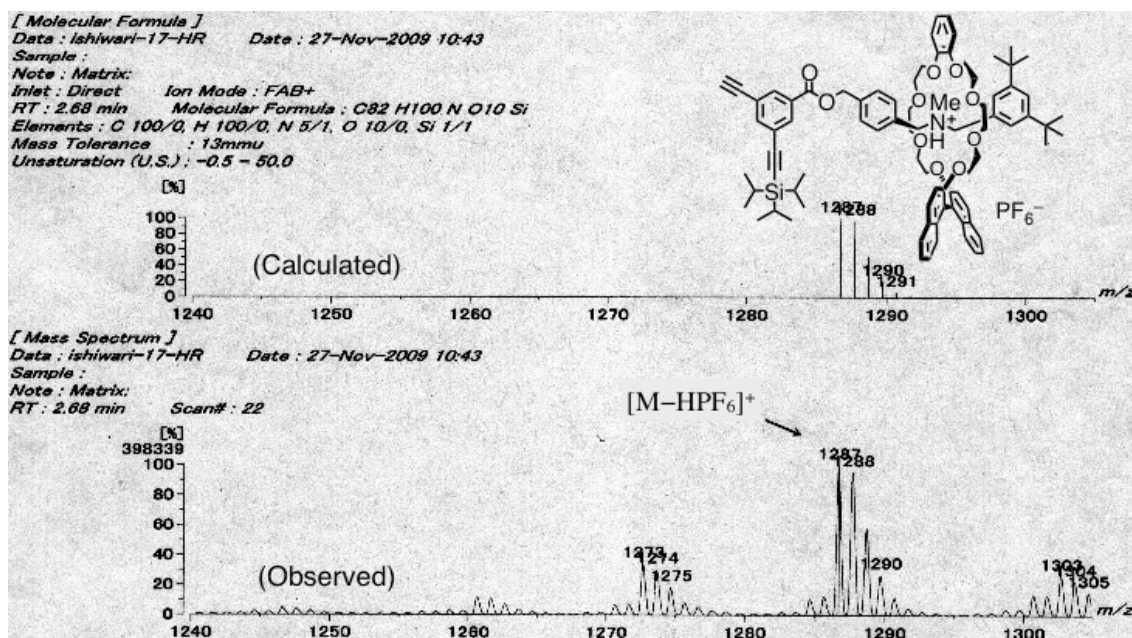

Figure S9. FAB-MS spectrum of (R)-1b (Ion mode: FAB<sup>+</sup>, matrix: NBA, solvent: CHCl<sub>3</sub>)

### 3-3. FT-IR spectra

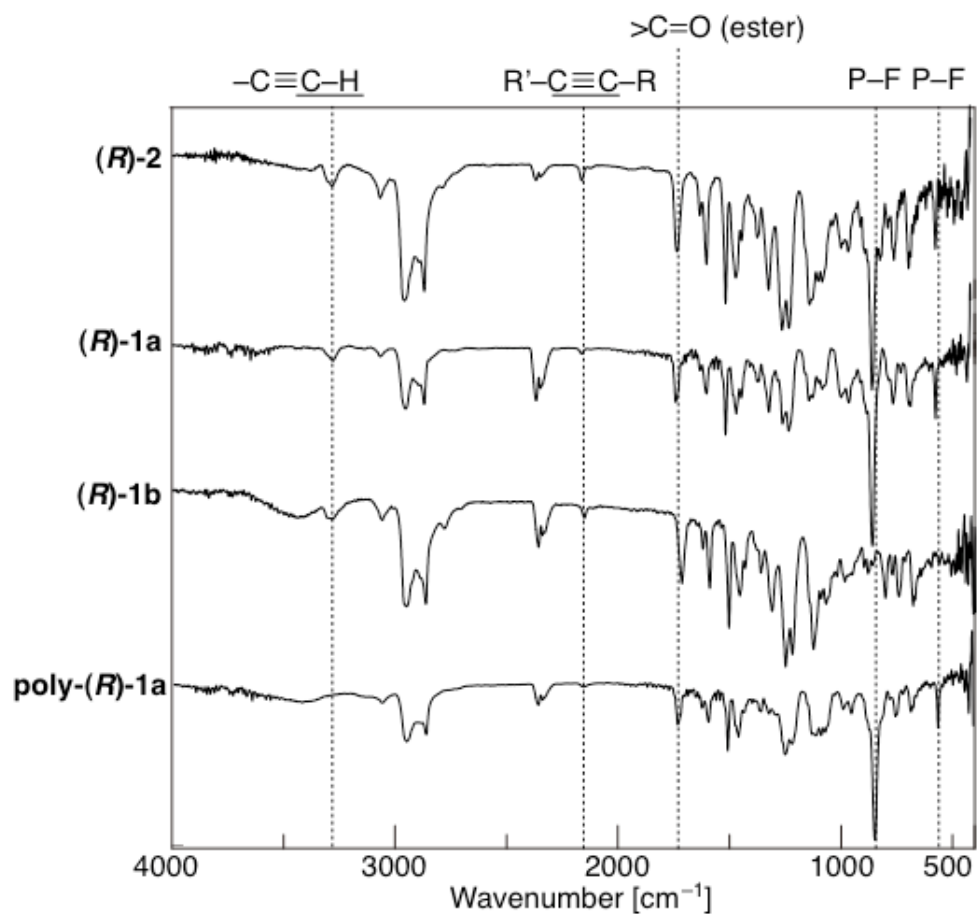

**Figure S10.** FT-IR spectra of *(R)*-2, *(R)*-1a, *(R)*-1b, and poly-*(R)*-1a (KBr)

### 3-4. CD and UV-vis spectra

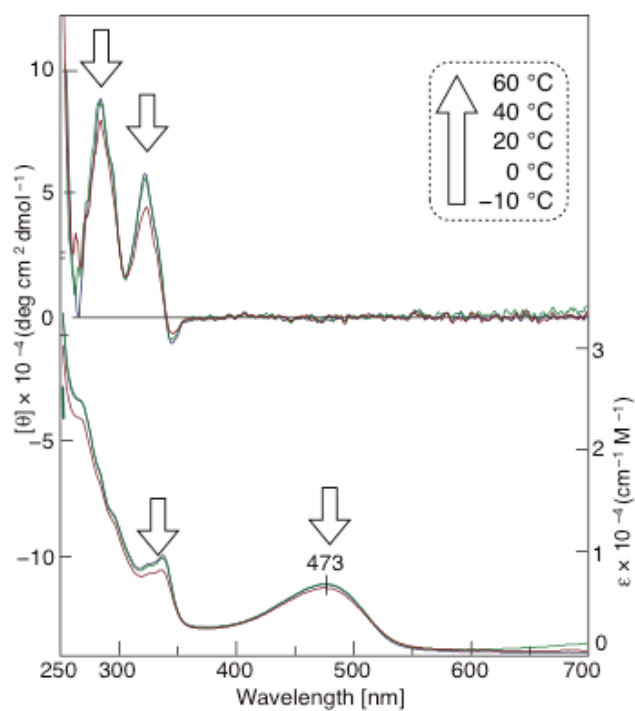

**Figure S11.** CD and UV-vis spectra of **poly-(R)-1a** (THF, 0.10 mM for monomer unit, 263–333 K)

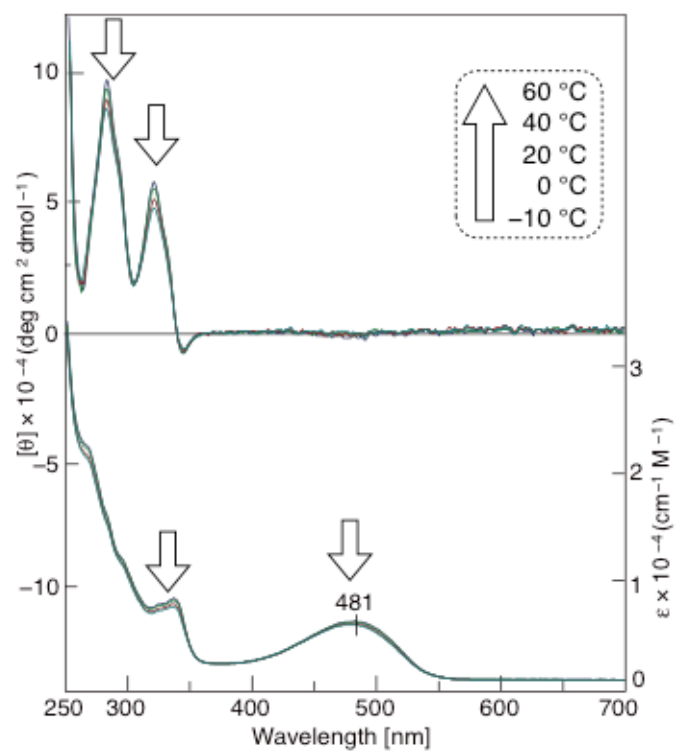

**Figure S12.** CD and UV-vis spectra of **poly-(R)-1a** ( $\text{CHCl}_3$ , 0.10 mM for monomer unit, 263–333 K)

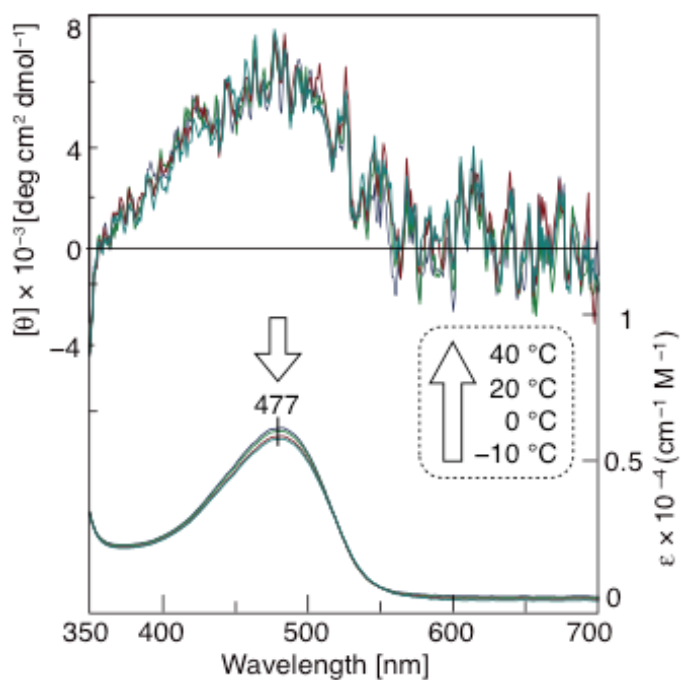

**Figure S13.** CD and UV-vis spectra of **poly-(R)-1a** (Acetone, 0.10 mM for monomer unit, 263–313 K)

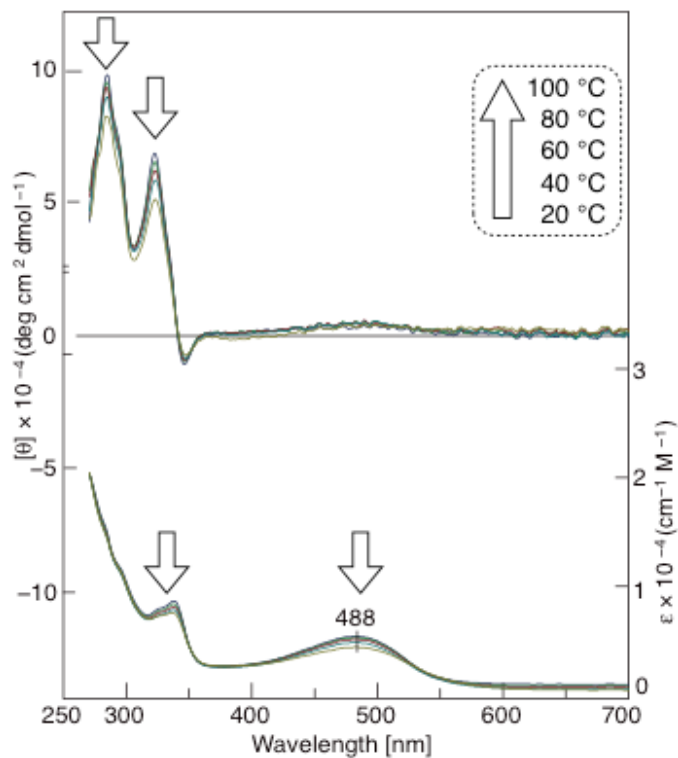

**Figure S14.** CD and UV-vis spectra of **poly-(R)-1a** (DMSO, 0.10 mM for monomer unit, 293–373 K)

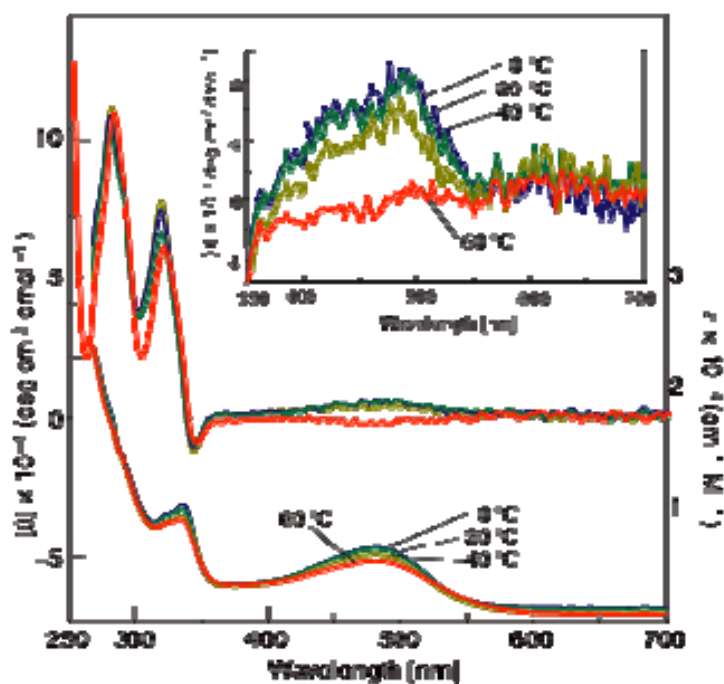

**Figure S15.** Investigation of helix stability in THF using **poly-(R)-1a**. The polymer was prepared by one-handed helix formation in acetone and subsequent removal of acetone. Variable temperature CD and UV-vis spectra of **poly-(R)-1a** (THF, 0.14 mM, 273–333 K)



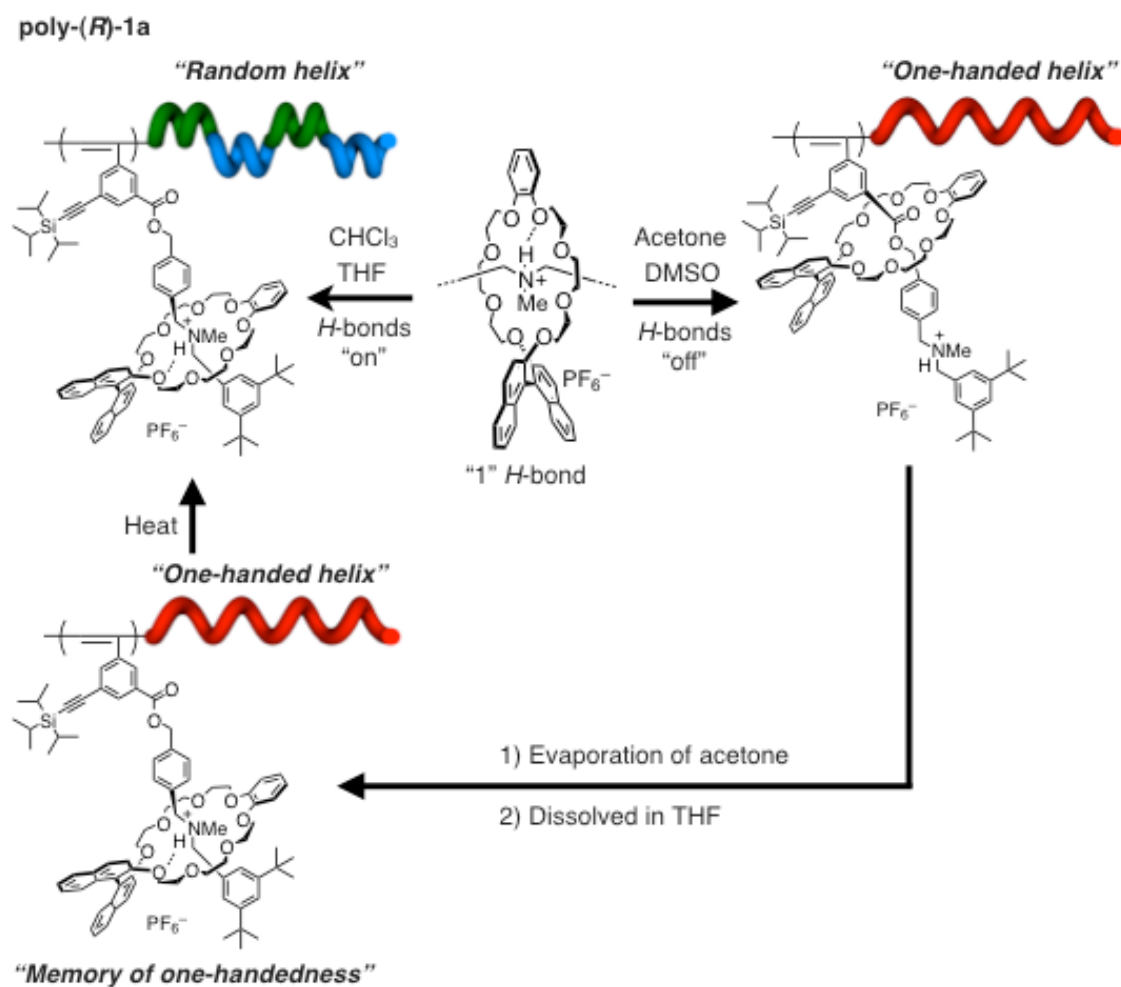

**Figure S16.** Schematic illustrations of the effect of solvent on **poly-(R)-1a**



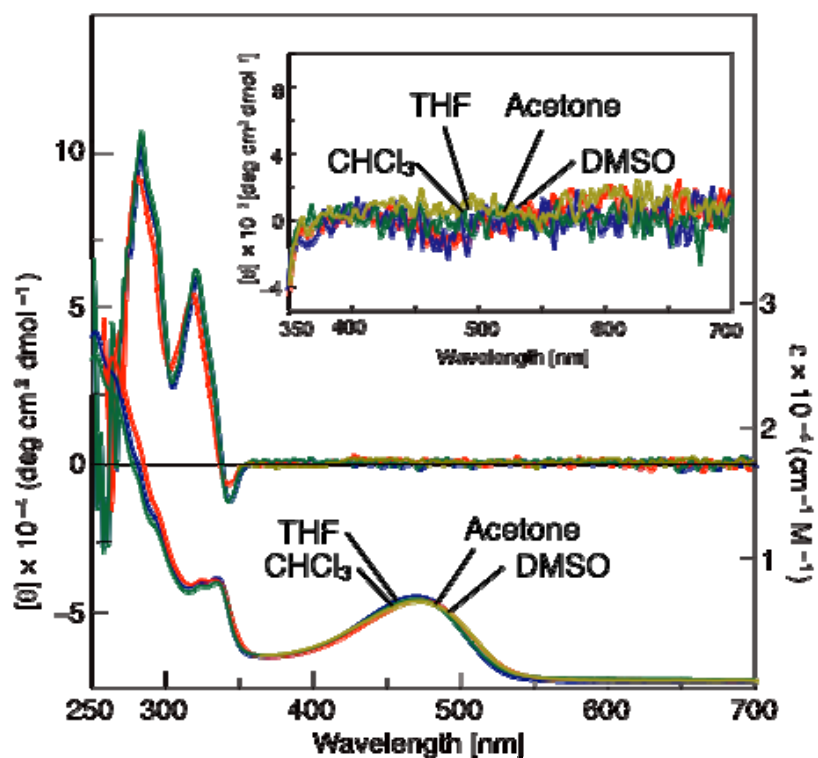

**Figure S17.** CD and UV-vis spectra of **poly-(R)-2** in various solvents (CHCl<sub>3</sub>, THF, acetone, and DMSO, 293 K, 0.14 mM). Inset shows expanded CD spectra (350–500 nm).

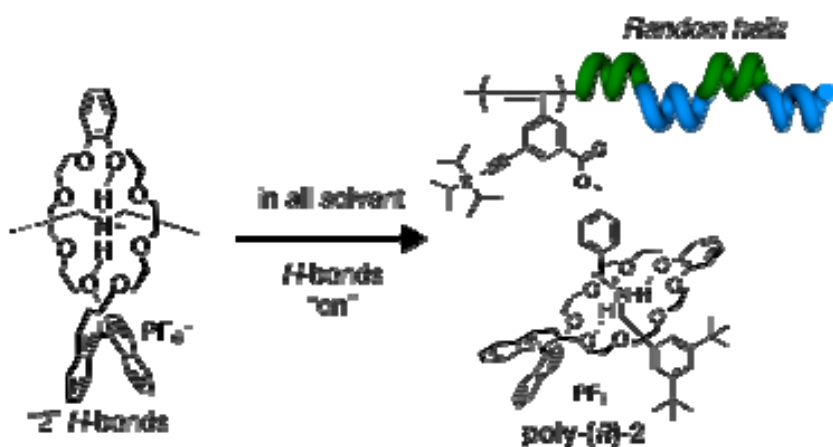

**Figure S18.** Schematic illustrations of the effect of solvent on **poly-(R)-2**

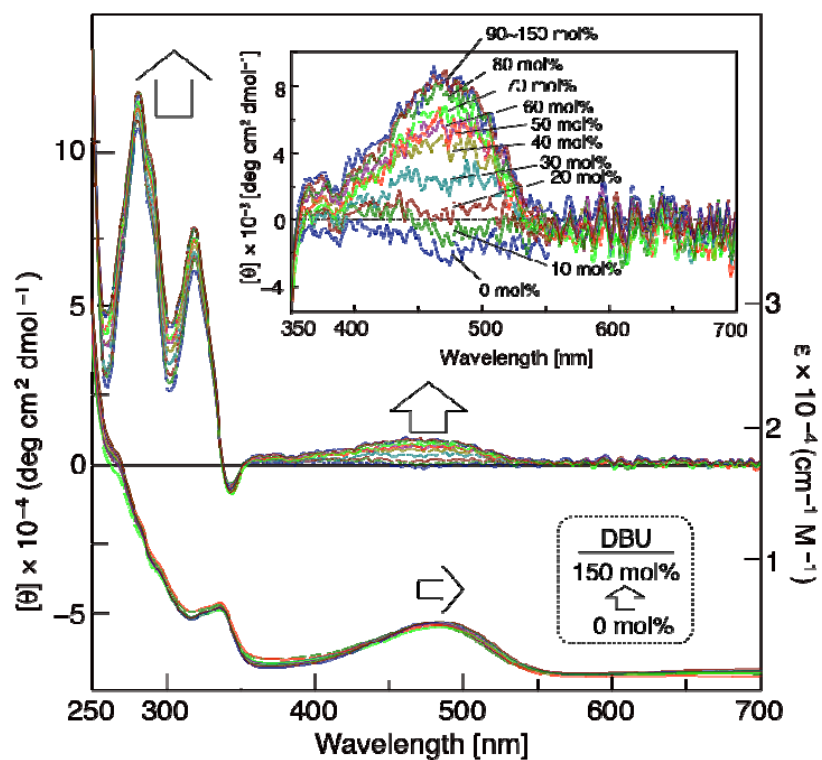

Figure S19. Titration of poly-(R)-1a by DBU ( $\text{CHCl}_3$ , 293K, 0.14 mM)

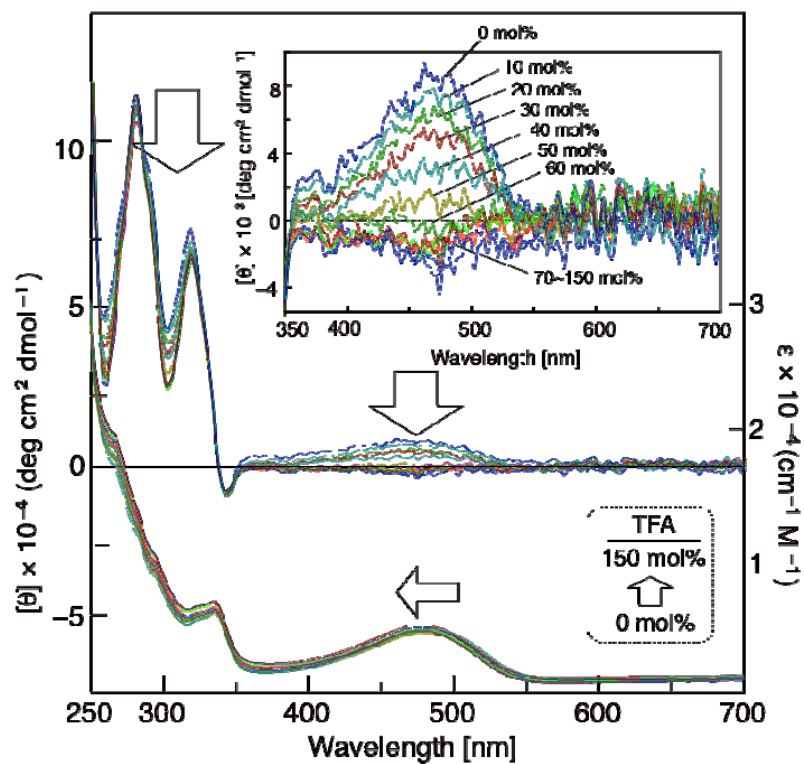

**Figure S20.** Titration of **poly-(R)-1b** by TFA (CHCl<sub>3</sub>, 293K, 0.14 mM)

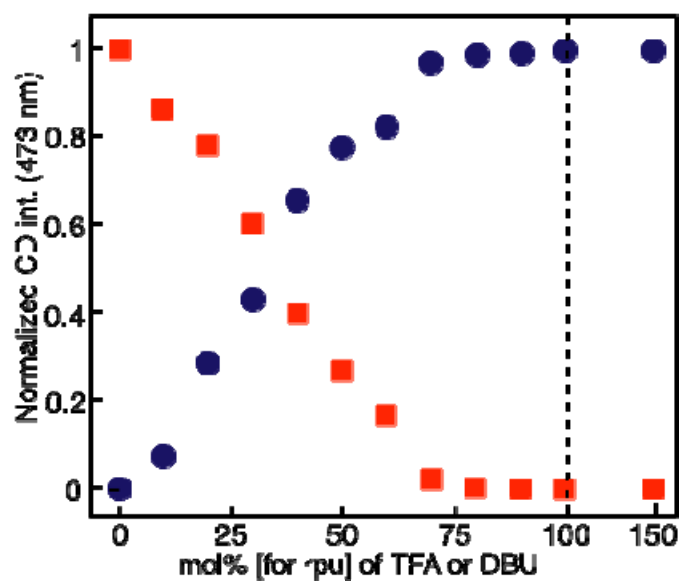

**Figure S21.** Titration result of DBU to **poly-(R)-1a** (blue circle) and titration result of TFA to **poly-(R)-1b** (red square) (CHCl<sub>3</sub>, 293 K, 0.14 mM).

### 3-5. UV and FP spectra

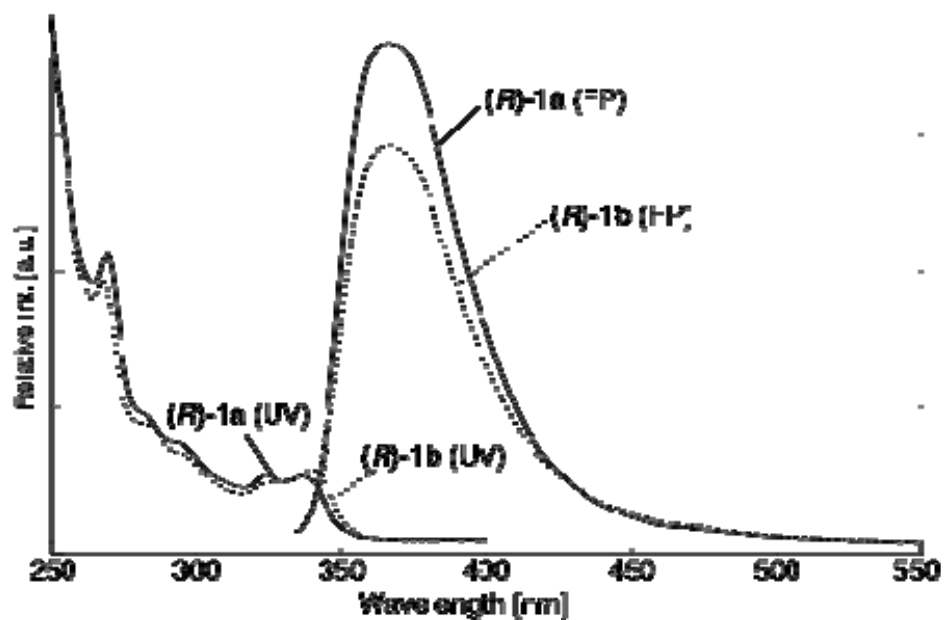

Figure S22. UV and FP spectra of *(R)*-1a in *(R)*-1b ( $\text{CHCl}_3$ , 293 K, O.D. = 0.10 at 325 nm,  $\lambda_{\text{ex}}$  = 325 nm).

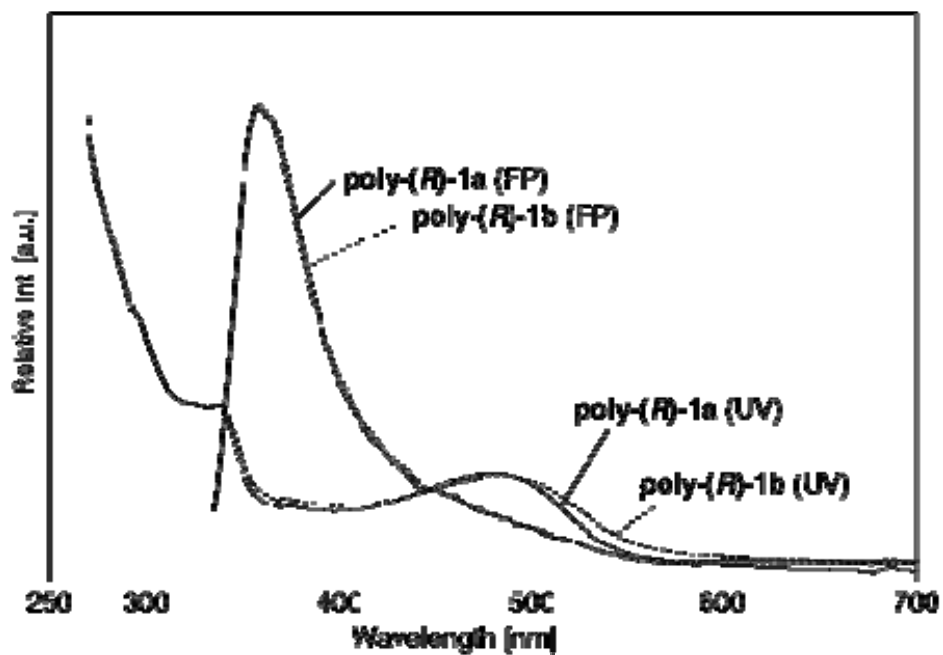

Figure S23. UV and FP spectra of poly-*(R)*-1a in poly-*(R)*-1b ( $\text{CHCl}_3$ , 293 K, O.D. = 0.10 at 325 nm,  $\lambda_{\text{ex}}$

= 325 nm).

#### 4. References

- 1) F. Ishiwari, K. Fukasawa, T. Sato, K. Nakazono, Y. Koyama, T. Takata, *Chem. Eur. J.* **2011**, *in press*
- 2) S. Suzuki, K. Nakazono, T. Takata, *Org. Lett.* **2010**, *12*, 712.
